# Supplementary material for: V-containing ZrO2 inorganic yellow nano-pigments
Source: Royal Society of Chemistry journal article supplement (doi:10.1039/c5ra08762g), 2015-01-01
Supplement: c5ra08762g1.pdf [file c5ra08762g1.pdf]

## Electronic Supplementary Information

### V-containing ZrO<sub>2</sub> inorganic yellow nano-pigments

José Miguel Calatayud, Pablo Pardo and Javier Alarcón

University of Valencia, Department of Inorganic Chemistry, Calle Doctor Moliner 50, 46100-

Burjasot (Valencia), Spain

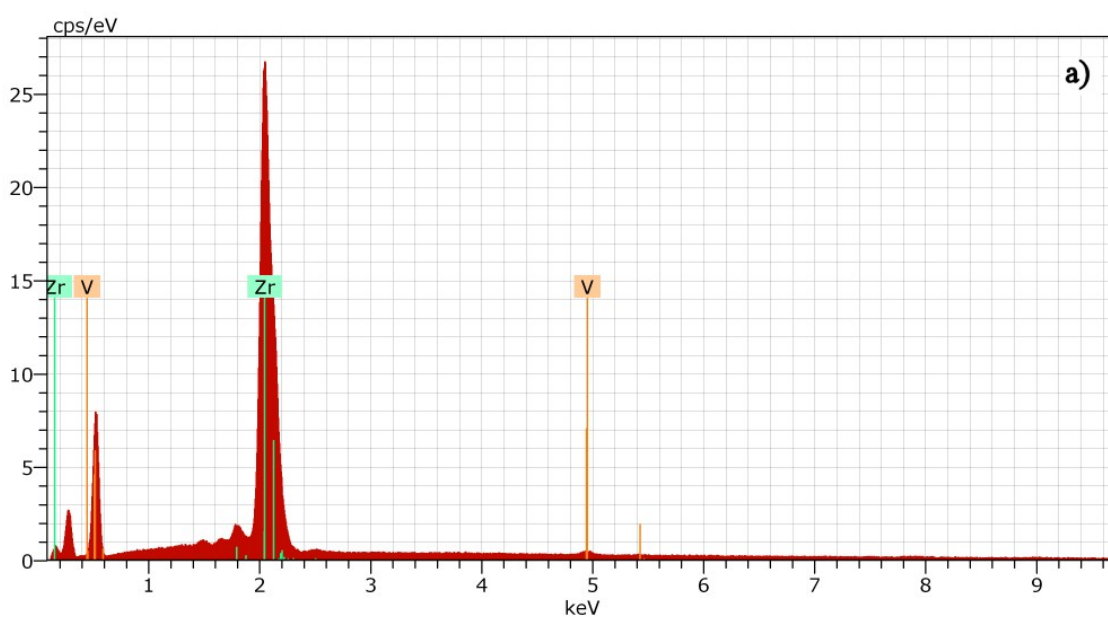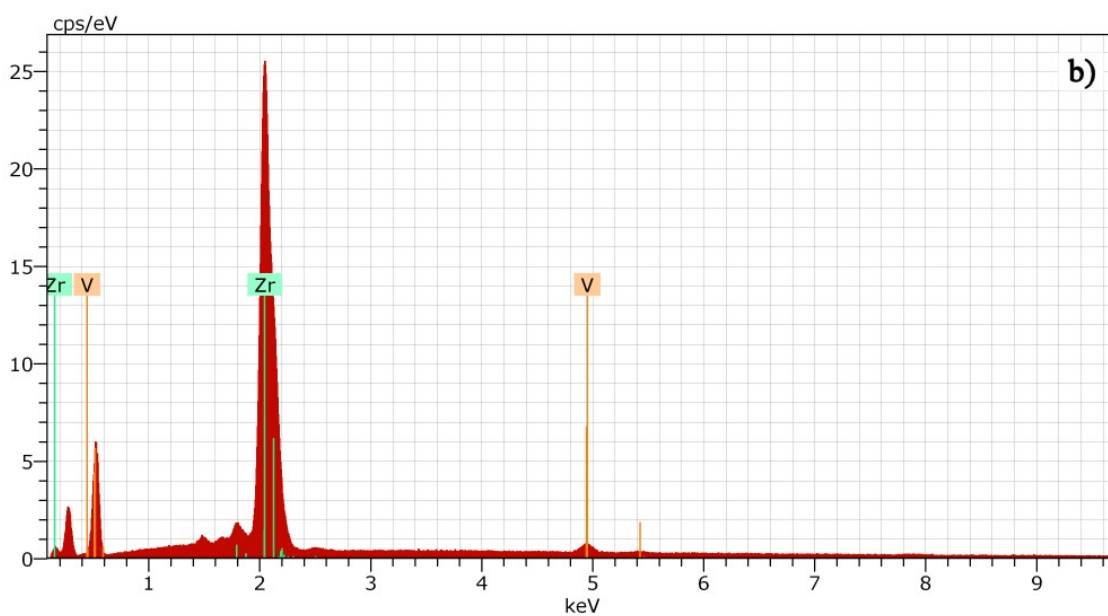

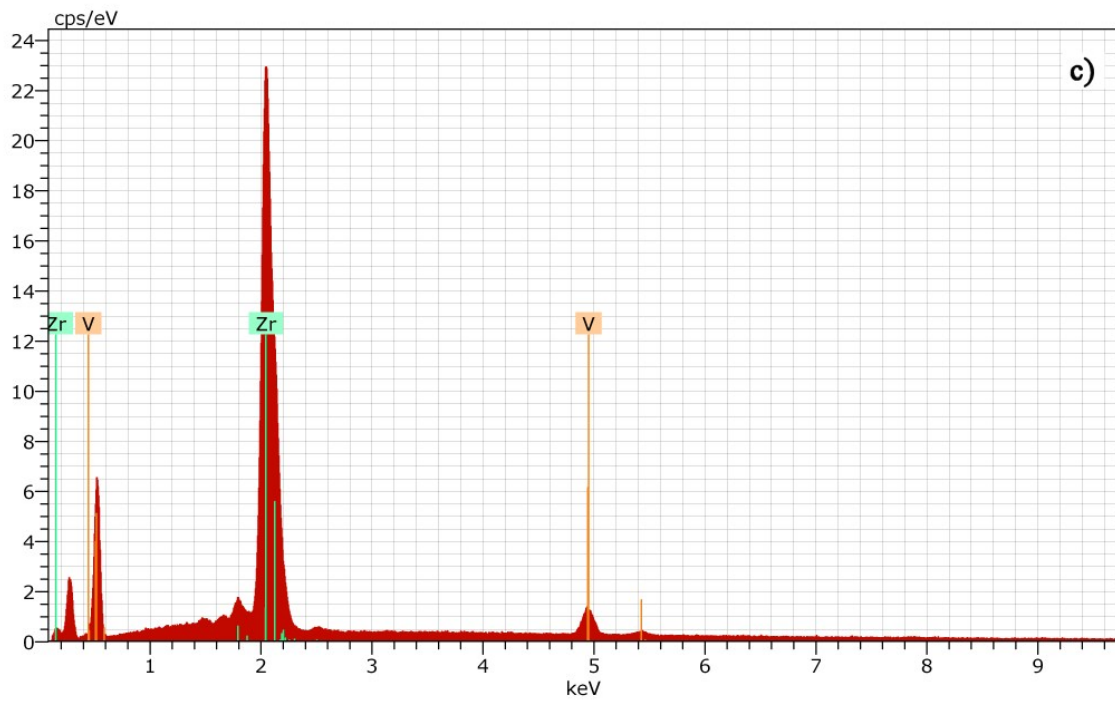

Fig. 1S. EDX microanalysis of as-obtained  $V_xZr_{1-x}O_2$  precipitates. a)  $x=0.015$ , b)  $x=0.05$  and c)  $x=0.1$ .

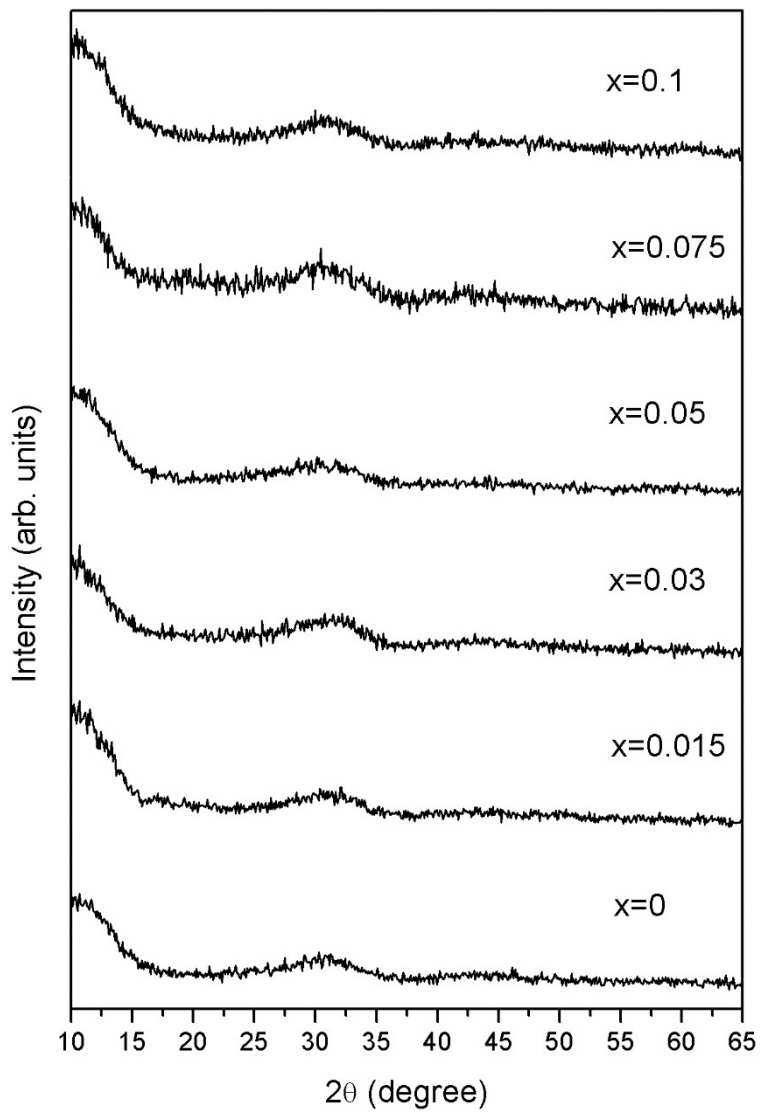

Fig. 2S. XRD patterns of as-obtained  $V_xZr_{1-x}O_2$  precipitates.

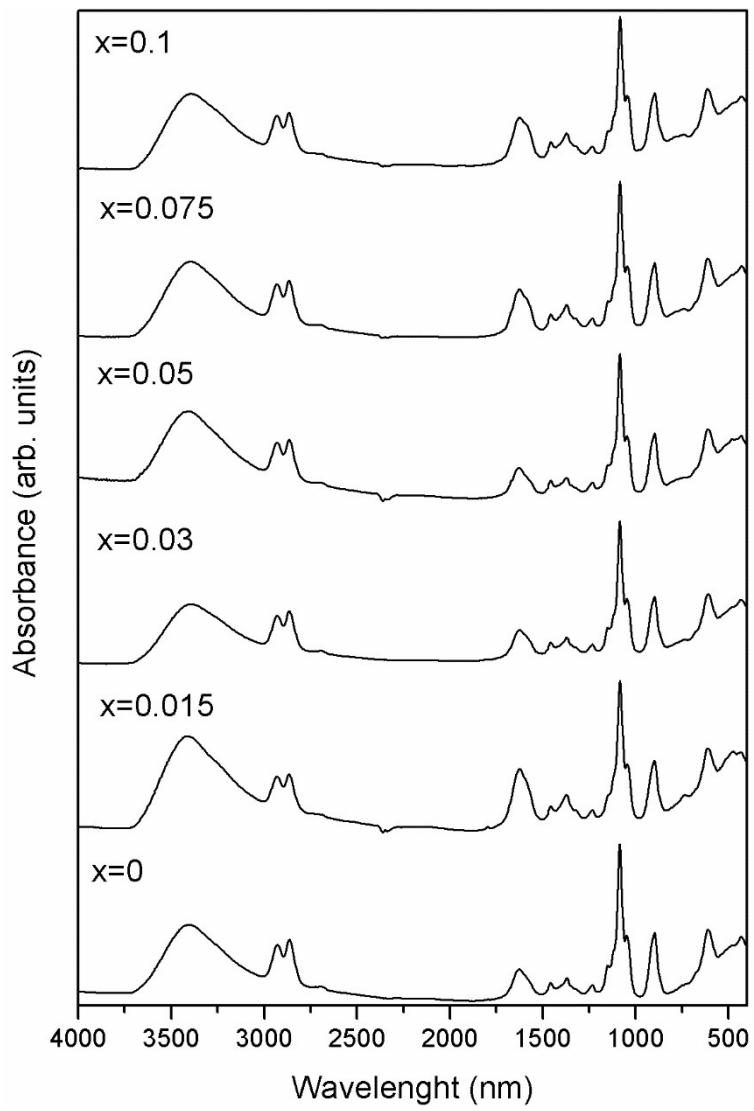

Fig. 3S. IR spectra of as-obtained  $V_xZr_{1-x}O_2$  precipitates.

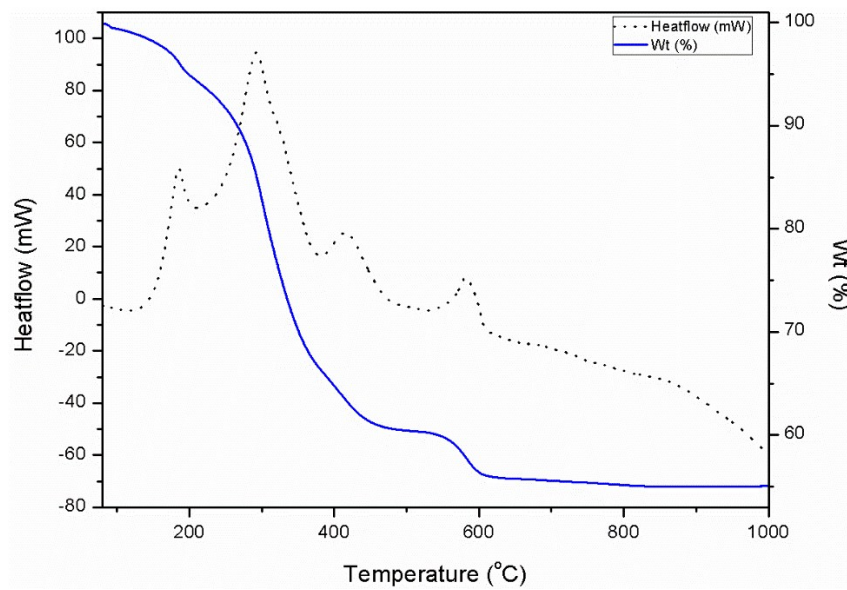

Fig. 4S. TG and DTA of the as-obtained  $V_{0.05}Zr_{0.95}O_2$  precipitate.

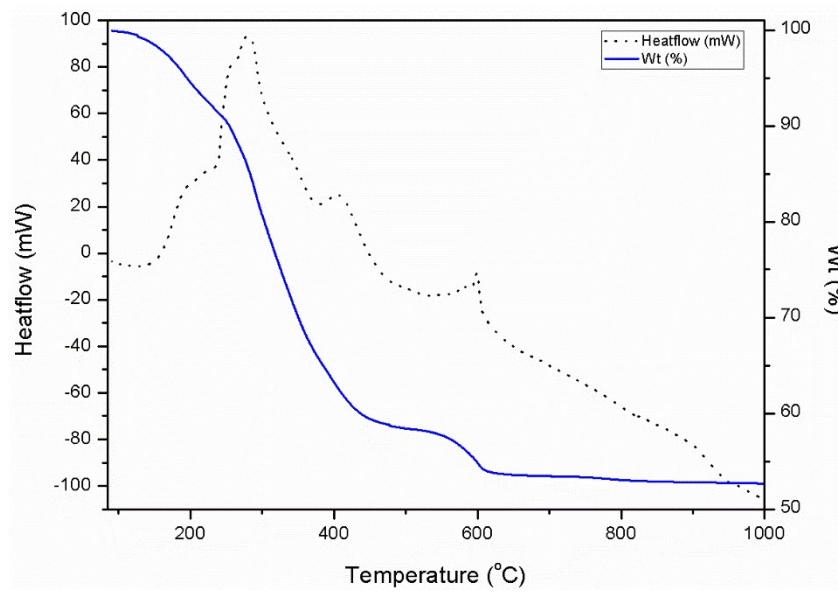

Fig. 5S. TG and DTA of the as-obtained  $V_{0.1}Zr_{0.9}O_2$  precipitate.

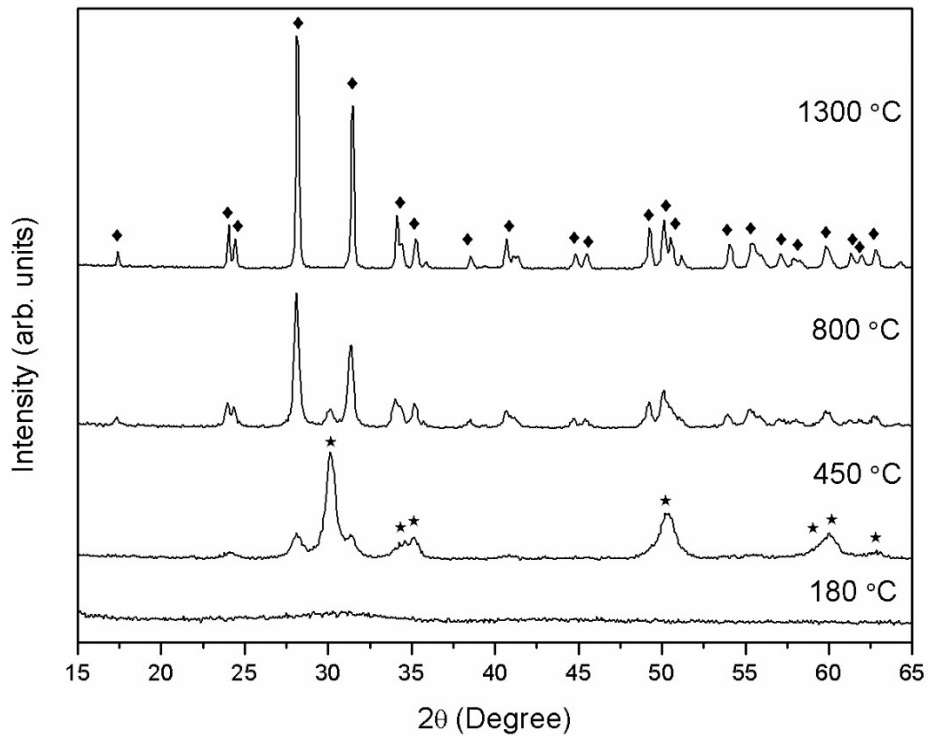

Fig. 6S. XRD patterns of undoped ZrO<sub>2</sub> precipitate prepared by using EG as solvent after annealing at different temperatures for 3h. ★ is tetragonal zirconia and ◆ is monoclinic zirconia.

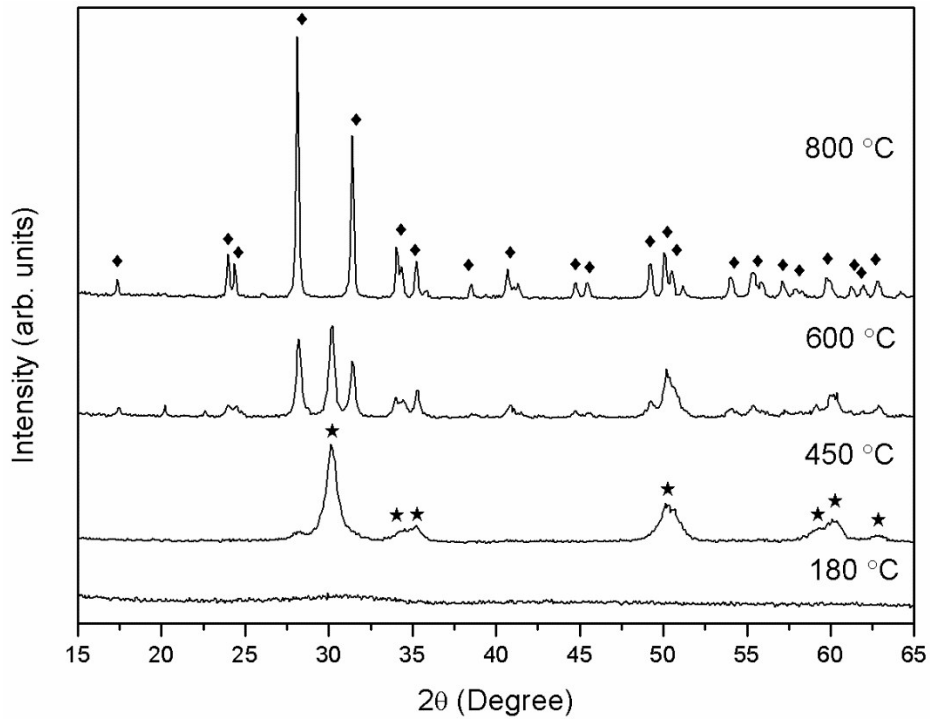

Fig. 7S. XRD patterns of  $V_{0.1}Zr_{0.9}O_2$  precipitate prepared by using EG as solvent after annealing at different temperatures for 3h. ★ is tetragonal zirconia and ◆ is monoclinic zirconia.



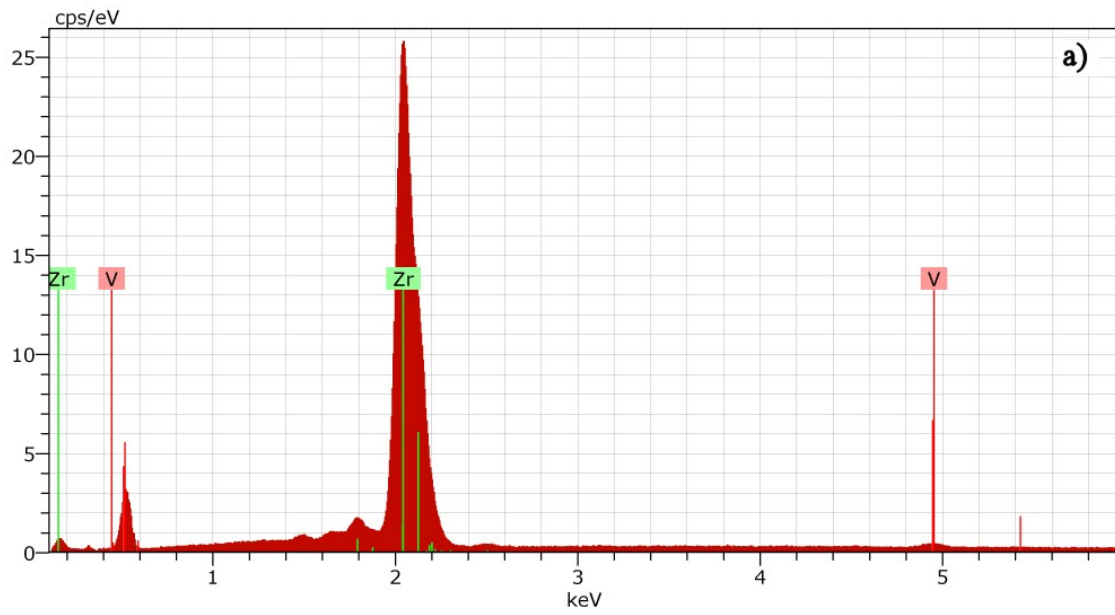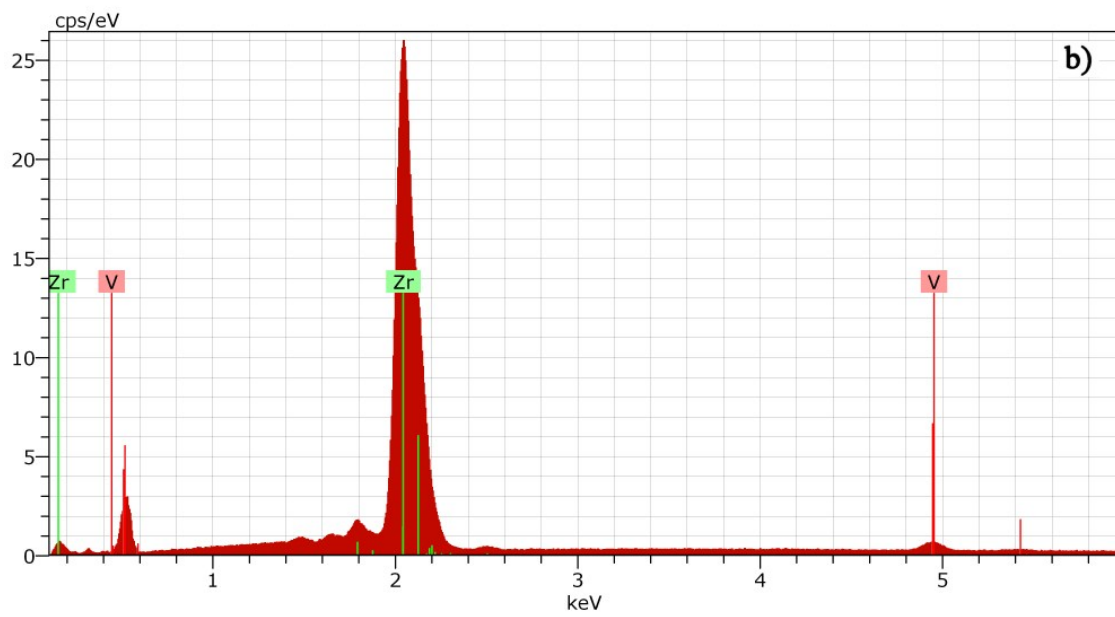

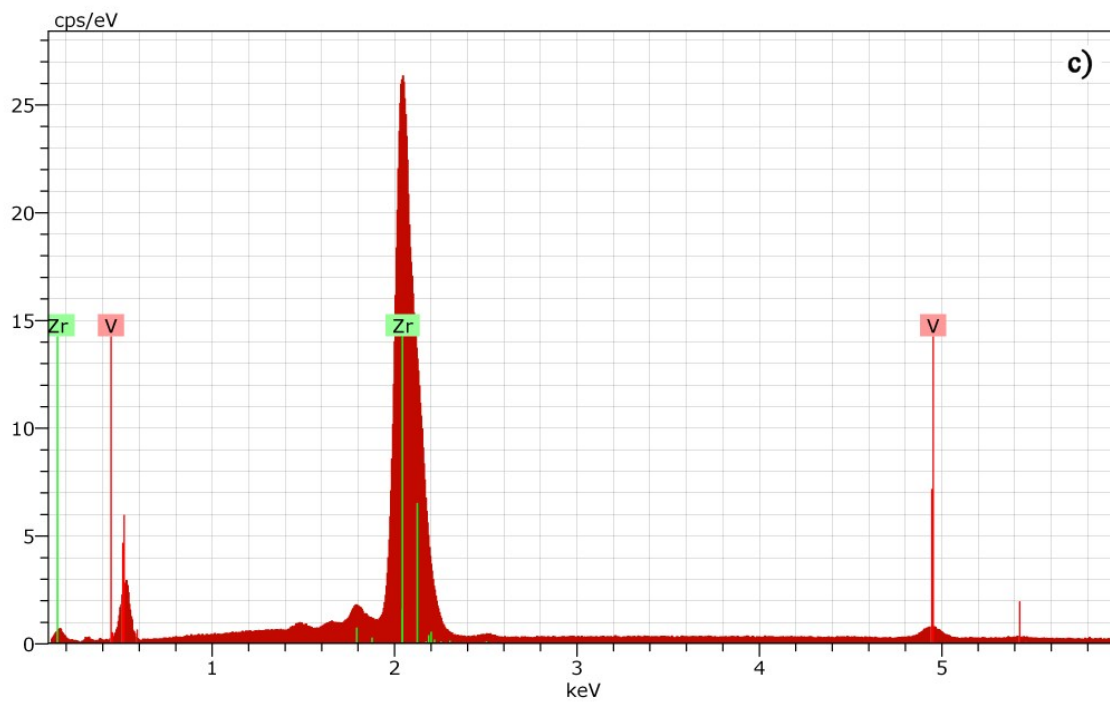

Fig. 8S. EDX microanalysis of monoclinic  $V_xZr_{1-x}O_2$  nano-pigments after annealing at 800°C. a)  $x=0.015$ , b)  $x=0.05$  and c)  $x=0.1$ .
